# Supplementary material for: High Expression of Integrin α3 Predicts Poor Prognosis and Promotes Tumor Metastasis and Angiogenesis by Activating the c-Src/Extracellular Signal-Regulated Protein Kinase/Focal Adhesion Kinase Signaling Pathway in Cervical Cancer
Source: PubMed Central journal article supplement (PMC7033469; doi:10.3389/fonc.2020.00036), 2020-02-14
Supplement: Image_1.pdf [file Image_1.pdf]

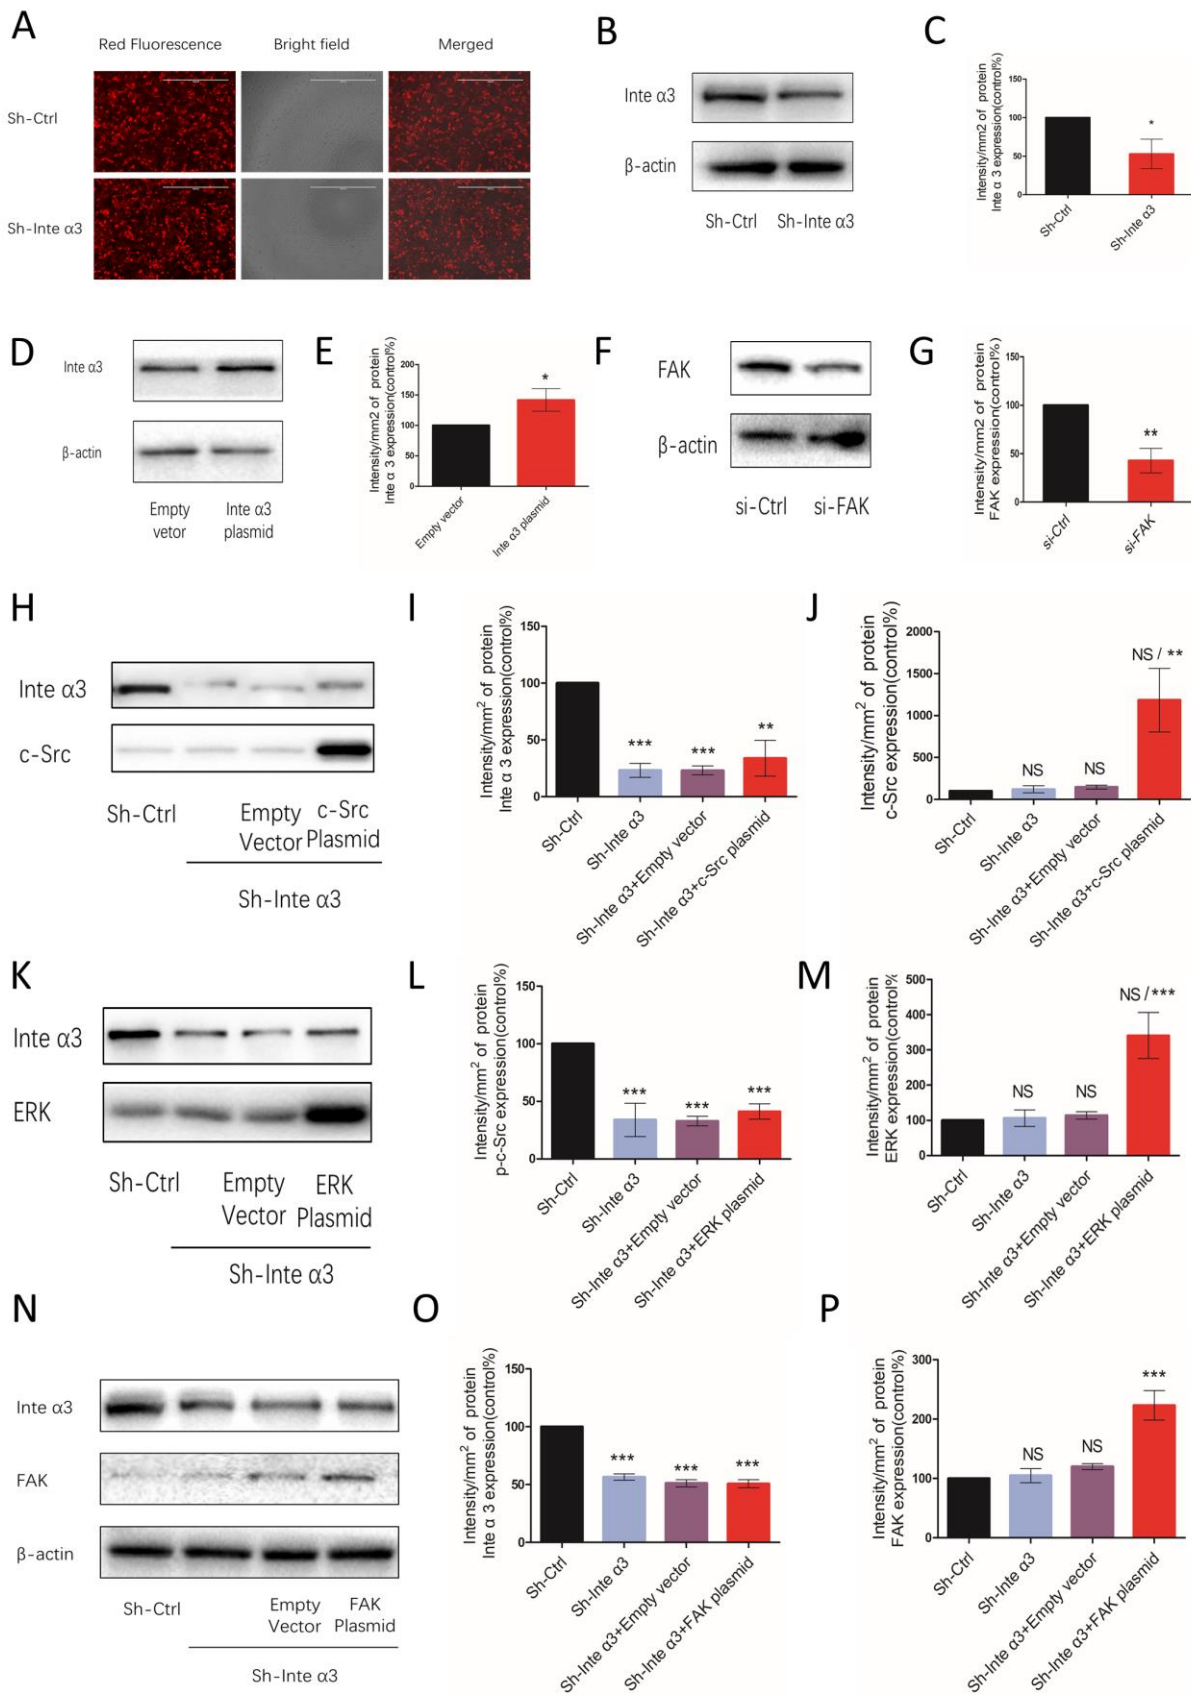

**Figure S1. Efficiency of shRNA/siRNA/plasmid in this study.** (A) Red fluorescence and bright field images of SiHa cell treated with ITGA3 lentivirus and corresponding control lentivirus, showing lentivirus transfection rate. Original magnification:  $\times 100$ ; (B) Western blotting images showed the integrin  $\alpha 3$  level change after treated with lenti-ITGA3 lentivirus. (C) Quantification of protein intensity in (B); (D) Western blotting images showed the integrin  $\alpha 3$  level change after treated with integrin  $\alpha 3$  plasmid. (E) Quantification of protein intensity in (D); (F) Western blotting images showed the FAK level change after treated with FAK siRNA. (G) Quantification of protein intensity in (F); (H) Integrin  $\alpha 3$  and c-Src expression were showed by western blotting among groups Sh-Ctrl, Sh-Inte  $\alpha 3$ , Sh-Inte  $\alpha 3$ +Empty vector and Sh-Inte  $\alpha 3$ +c-Src plasmid, responding quantification of integrin  $\alpha 3$  and c-Src protein intensity were presented in (I) and (J); (K) Integrin  $\alpha 3$  and ERK expression were showed by western blotting among groups Sh-Ctrl, Sh-Inte  $\alpha 3$ , Sh-Inte  $\alpha 3$ +Empty vector and Sh-Inte  $\alpha 3$ +ERK plasmid, responding quantification of integrin  $\alpha 3$  and ERK protein intensity were presented in (L) and (M); (N) Integrin  $\alpha 3$ , FAK,  $\beta$ -actin expression were showed by western blotting among groups Sh-Ctrl, Sh-Inte  $\alpha 3$ , Sh-Inte  $\alpha 3$ +Empty vector and Sh-Inte  $\alpha 3$ +FAK plasmid, responding quantification of integrin  $\alpha 3$  and FAK protein intensity were presented in (O) and (P);

\* =  $P < 0.05$  vs. corresponding control; \*\* =  $P < 0.01$ ; \*\*\* =  $P < 0.001$ ; # =  $P < 0.05$  vs. corresponding group (e.g. Sh-Inte  $\alpha$ +empty vector vs Sh-Inte  $\alpha 3$ +FAK plasmid), ## =  $P < 0.01$ , ### =  $P < 0.001$ ; All the experiments were repeated three times with consistent results, and the representative images are shown.
